# Supplementary material
Source: PubMed Central journal article supplement (PMC3882084)
Supplement: NIHMS514974-supplement-supplement_1.pdf [file NIHMS514974-supplement-supplement_1.pdf]

**Supplemental Table 1:** Auditory emotion recognition scores for controls vs. schizophrenia patients for stimuli defined a priori based upon physical features as utilizing pitch- vs. intensity-modulation to convey either anger (top row) or happiness (bottom) row.

| Emotion   | Group | Pitch   |      |         |      | t (p)       | Intensity |      |         |      | t (p) |
|-----------|-------|---------|------|---------|------|-------------|-----------|------|---------|------|-------|
|           |       | Control |      | Patient |      |             | Control   |      | Patient |      |       |
|           |       | Mean    | sd   | Mean    | sd   |             | Mean      | sd   | Mean    | sd   |       |
| Anger     |       | 31.9    | 27.8 | 19.1    | 21.5 | 2.51 (.014) | 46.9      | 17.9 | 44.6    | 16.9 | .6    |
| Happiness |       | 58.3    | 33.9 | 45.3    | 31   | 2.57 (.01)  | 18.1      | 20.1 | 19.4    | 24.4 | .3    |

**Supplemental Table 2:** Face emotion (ER-40) measures for individual emotions in control and schizophrenia patients

| <b>Emotion</b>    | <b>Control (n=63)</b> |           | <b>Patient (n=77)</b> |           | <b>t</b> | <b>p</b> |
|-------------------|-----------------------|-----------|-----------------------|-----------|----------|----------|
|                   | <b>Mean</b>           | <b>SD</b> | <b>Mean</b>           | <b>SD</b> |          |          |
| <b>Happiness</b>  | 98.2                  | 4.9       | 96.4                  | 6.4       | 1.82     | 0.07     |
| <b>Sadness</b>    | 84.3                  | 16.0      | 75.8                  | 17.1      | 3.01     | 0.003    |
| <b>Fear</b>       | 86.5                  | 14.4      | 64.9                  | 24.0      | 6.27     | <.001    |
| <b>Anger</b>      | 65.5                  | 18.1      | 59.3                  | 20.8      | 1.80     | 0.06     |
| <b>No emotion</b> | 87.3                  | 13.2      | 72.0                  | 28.8      | 3.89     | <.001    |

**Supplemental Table 3:** Correlations between auditory and visual emotion recognition measures by intended emotion across patients (n=77)

| <b>Auditory\Visual</b> | <b>Happiness</b> | <b>Sadness</b> | <b>Anger</b> | <b>Fear</b> | <b>No Emotion</b> |
|------------------------|------------------|----------------|--------------|-------------|-------------------|
| <b>Happiness</b>       | 0.18             | 0.02           | 0.02         | 0.14        | 0.10              |
| <b>Sadness</b>         | 0.05             | <b>0.46</b>    | 0.14         | 0.27        | 0.12              |
| <b>Anger</b>           | 0.18             | 0.28           | 0.22         | 0.02        | -0.06             |
| <b>Fear</b>            | 0.13             | 0.17           | 0.24         | 0.26        | 0.06              |
| <b>No Emotion</b>      | 0.16             | -0.04          | 0.25         | 0.22        | <b>0.51</b>       |

*P*<.05

*P*<.01

**Supplemental table 4:** Performance by emotion (brief battery) across all stimuli in replication sample

|                   | Patients (n=36) |      | Age-matched controls (n=31) |      | General controls (n=188) |      | Statistics |       |        |
|-------------------|-----------------|------|-----------------------------|------|--------------------------|------|------------|-------|--------|
|                   | Mean            | SD   | Mean                        | SD   | Mean                     | SD   | F          | df    | p      |
| <b>Happiness</b>  | 25.8            | 18.4 | 38.3                        | 21.2 | 39.1                     | 20.1 | 6.79       | 2,252 | .001   |
| <b>Sadness</b>    | 61.5            | 23.5 | 75.2                        | 23.1 | 85.2                     | 18.3 | 23.3       | 2,252 | <.0001 |
| <b>Fear</b>       | 63.8            | 24.7 | 78.0                        | 17.3 | 77.6                     | 19.2 | 7.53       | 2,252 | .001   |
| <b>Anger</b>      | 44.4            | 25.9 | 59.7                        | 26.4 | 52.7                     | 20.5 | 4.06       | 2,252 | .02    |
| <b>No emotion</b> | 69.8            | 30.0 | 90.8                        | 17.1 | 86.2                     | 17.7 | 12.1       | 2,252 | <.0001 |
